# Supplementary material for: Prognostic value of preoperative neutrophil-to-lymphocyte ratio in histological variants of non-muscle-invasive bladder cancer
Source: PubMed Central journal article supplement — Investig Clin Urol. 2021 Oct 27;62(6):641–9. doi: 10.4111/icu.20210278 (PMC8566785; doi:10.4111/icu.20210278), 2021-10-27
Supplement: icu-62-641-s001.pdf [file icu-62-641-s001.pdf]

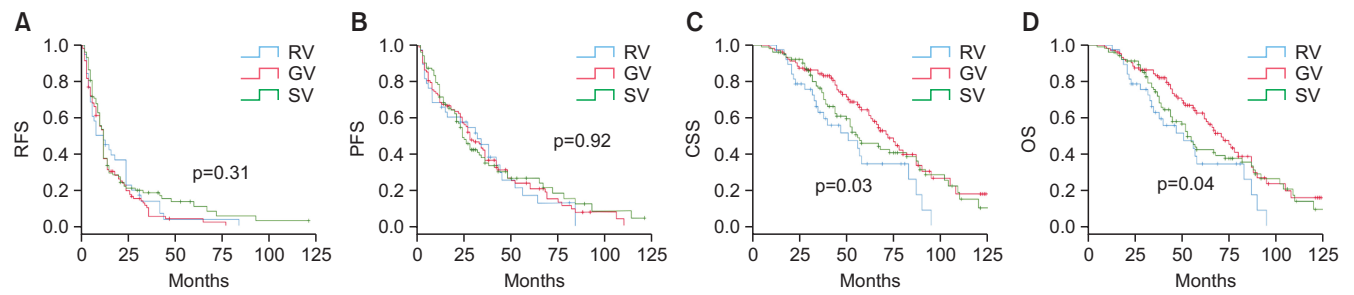

**Supplementary Fig. 1.** Kaplan–Meier plots depicting (A) RFS, (B) PFS, (C) CSS, and (D) OS according to the different histological subtypes (RV group, GV group, and SV group). RFS, recurrence-free survival; PFS, progression-free survival; CSS, cancer-specific survival; OS, overall survival; RV, rare histological variant; GV, glandular variant; SV, squamous variant.
