# Supplementary material for: Prognostic value of preoperative neutrophil-to-lymphocyte ratio in histological variants of non-muscle-invasive bladder cancer
Source: PubMed Central journal article supplement — Investig Clin Urol. 2021 Oct 27;62(6):641–9. doi: 10.4111/icu.20210278 (PMC8566785; doi:10.4111/icu.20210278), 2021-10-27
Supplement: icu-62-641-s002.pdf [file icu-62-641-s002.pdf]

Supplementary Table 1. The p-value of PNLR according to the classification of clinicopathological characteristics

| Variable                 | Total group |        |        |        | GV group |        |        |        | SV group |        |        |        |
|--------------------------|-------------|--------|--------|--------|----------|--------|--------|--------|----------|--------|--------|--------|
|                          | RFS         | PFS    | CSS    | OS     | RFS      | PFS    | CSS    | OS     | RFS      | PFS    | CSS    | OS     |
| Age (y)                  |             |        |        |        |          |        |        |        |          |        |        |        |
| ≥60                      | <0.001      | 0.001  | <0.001 | <0.001 | 0.117    | 0.051  | 0.020  | 0.033  | 0.005    | 0.029  | 0.002  | 0.001  |
| <60                      | 0.007       | <0.001 | <0.001 | <0.001 | 0.060    | 0.003  | 0.045  | 0.061  | 0.264    | 0.019  | 0.001  | 0.001  |
| Sex                      |             |        |        |        |          |        |        |        |          |        |        |        |
| Male                     | <0.001      | <0.001 | <0.001 | <0.001 | 0.033    | 0.002  | 0.003  | 0.006  | 0.007    | 0.002  | <0.001 | <0.001 |
| Female                   | 0.014       | 0.081  | 0.621  | 0.616  | 0.430    | 0.029  | 0.385  | 0.229  | 0.321    | 0.294  | 0.994  | 0.994  |
| Smoker                   |             |        |        |        |          |        |        |        |          |        |        |        |
| Yes                      | <0.001      | <0.001 | <0.001 | <0.001 | 0.026    | 0.034  | 0.170  | 0.242  | 0.004    | 0.086  | <0.001 | <0.001 |
| No                       | 0.007       | <0.001 | <0.001 | <0.001 | 0.099    | 0.004  | 0.005  | 0.005  | 0.218    | 0.011  | 0.007  | 0.007  |
| BMI (kg/m <sup>2</sup> ) |             |        |        |        |          |        |        |        |          |        |        |        |
| ≥24.3                    | 0.328       | 0.064  | 0.002  | 0.002  | 0.003    | 0.377  | 0.050  | 0.124  | 0.215    | 0.221  | 0.043  | 0.028  |
| <24.3                    | <0.001      | <0.001 | <0.001 | <0.001 | 0.665    | <0.001 | 0.045  | 0.057  | 0.006    | 0.004  | <0.001 | <0.001 |
| Diabetes                 |             |        |        |        |          |        |        |        |          |        |        |        |
| Yes                      | 0.328       | 0.064  | 0.002  | 0.002  | -        | -      | -      | -      | -        | -      | -      | -      |
| No                       | <0.001      | <0.001 | <0.001 | <0.001 | 0.005    | 0.001  | <0.001 | 0.001  | 0.003    | <0.001 | <0.001 | <0.001 |
| Hypertension             |             |        |        |        |          |        |        |        |          |        |        |        |
| Yes                      | 0.130       | 0.067  | 0.088  | 0.030  | 0.923    | 0.199  | 0.264  | 0.264  | 0.198    | 0.188  | 0.346  | 0.115  |
| No                       | <0.001      | <0.001 | <0.001 | <0.001 | 0.002    | 0.001  | 0.004  | 0.010  | 0.010    | 0.005  | <0.001 | <0.001 |
| Multifocality            |             |        |        |        |          |        |        |        |          |        |        |        |
| Yes                      | <0.001      | <0.001 | <0.001 | <0.001 | 0.002    | 0.001  | <0.001 | 0.001  | 0.009    | 0.005  | 0.086  | 0.054  |
| No                       | -           | -      | -      | -      | -        | -      | -      | -      | -        | -      | -      | -      |
| Tumor size <sup>a</sup>  |             |        |        |        |          |        |        |        |          |        |        |        |
| ≥3                       | <0.001      | <0.001 | <0.001 | <0.001 | 0.003    | <0.001 | 0.001  | 0.003  | 0.002    | <0.001 | <0.001 | <0.001 |
| <3                       | 0.010       | 0.070  | <0.001 | <0.001 | 0.001    | <0.001 | 0.017  | 0.020  | 0.033    | 0.073  | 0.008  | 0.002  |
| T stage                  |             |        |        |        |          |        |        |        |          |        |        |        |
| Ta                       | -           | -      | -      | -      | -        | -      | -      | -      | -        | -      | -      | -      |
| T1                       | <0.001      | <0.001 | <0.001 | <0.001 | 0.003    | <0.001 | 0.001  | 0.003  | 0.002    | <0.001 | <0.001 | <0.001 |
| WHO grade                |             |        |        |        |          |        |        |        |          |        |        |        |
| High                     | <0.001      | <0.001 | <0.001 | <0.001 | 0.023    | 0.003  | 0.085  | 0.141  | 0.001    | 0.008  | <0.001 | <0.001 |
| Low                      | 0.142       | 0.001  | 0.007  | 0.007  | 0.342    | 0.017  | <0.001 | <0.001 | 0.942    | 0.020  | 0.669  | 0.669  |
| CIS                      |             |        |        |        |          |        |        |        |          |        |        |        |
| Yes                      | 0.057       | 0.444  | 0.010  | 0.005  | 0.700    | 0.893  | 0.563  | 0.563  | 0.034    | 0.177  | 0.003  | 0.001  |
| No                       | <0.001      | <0.001 | <0.001 | <0.001 | 0.004    | <0.001 | 0.002  | 0.004  | 0.015    | 0.001  | 0.002  | 0.001  |
| IVT                      |             |        |        |        |          |        |        |        |          |        |        |        |
| Yes                      | 0.092       | 0.006  | <0.001 | <0.001 | 0.009    | 0.005  | 0.075  | 0.051  | 0.008    | 0.020  | 0.162  | 0.095  |
| No                       | <0.001      | <0.001 | <0.001 | <0.001 | 0.091    | 0.001  | 0.152  | 0.241  | <0.001   | 0.004  | <0.001 | <0.001 |

PNLR, preoperative neutrophil-to-lymphocyte ratio; GV, glandular variant; SV, squamous variant; RFS, recurrence-free survival; PFS, progression-free survival; CSS, cancer-specific survival; OS, overall survival; BMI, body mass index; WHO, World Health Organization; CIS, carcinoma *in situ*; IVT, intravesical therapy; -, no data.

<sup>a</sup>:For multiple tumors, the diameter of the largest tumor was regarded as tumor size.
